# Supplementary material for: Earthquake Sources, the Stress Field and Seismic Hazard A Study in Eritrea and its Surrounding
Source: Frontiers journal article supplement (doi:10.3389/fcell.2022.835445), 2006-01-01
Supplement: Data_Sheet_1.pdf [file Data_Sheet_1.pdf]

Supplementary Materials for

**A single-cell characterization of human post-implantation embryos**

**cultured *in vitro* delineates morphogenesis in primary**

**syncytialization**

**This PDF file includes:**

Supplementary Figure 1 to 4

Supplementary Text

Supplemental Code

Supplementary Table 1 to 2

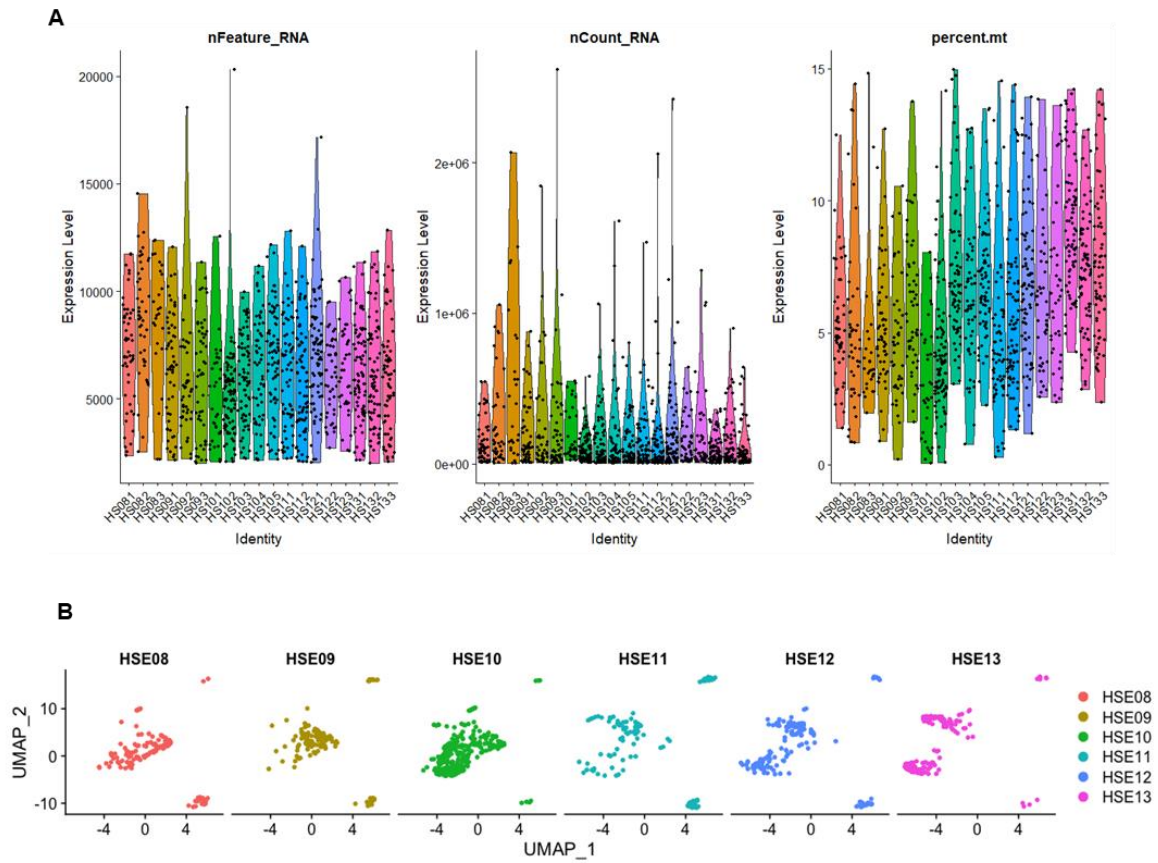

**Supplementary Figure 1. Single-cell RNA-seq of human embryos cultured *in vitro***

**A.** Violin plots showing the numbers of genes expressing more than 0 (left), total expression of all genes (middle), and percentage of mitochondrial gene expression (right) detected in every single cell.

**B.** The number of cells per embryonic day (day 8-day 13) retained after quality filtering.

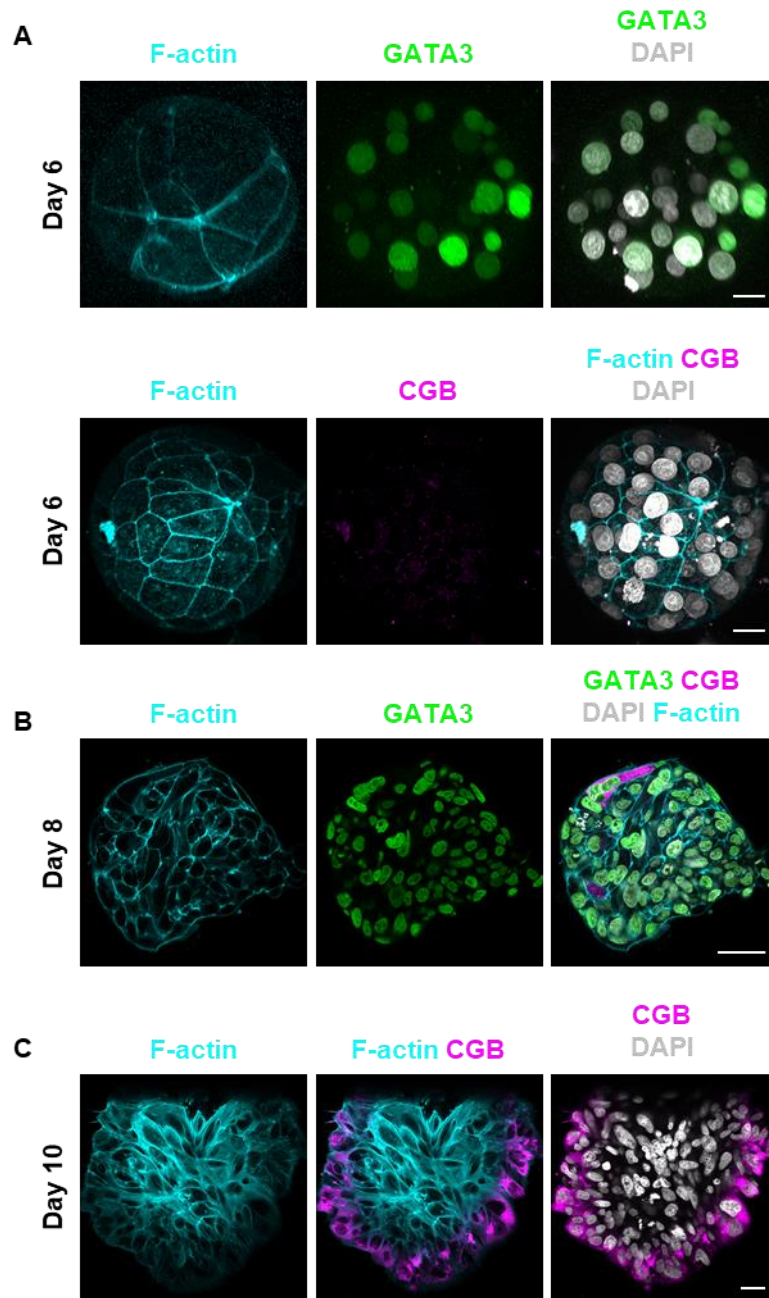

**Supplementary Figure 2. Immunostaining of human embryos for TE and trophoblast lineage markers.**

**A.** Immunostaining of day 6 human embryos for F-actin, GATA3, and CGB. DAPI, grey, DNA. Scale bars, 20  $\mu$ m.

**B.** Immunostaining of day 8 human embryos for F-actin, GATA3, and CGB. DAPI, grey, DNA. Scale bar, 50  $\mu$ m.

**C.** Immunostaining of day 10 human embryos for F-actin and CGB. DAPI, grey, DNA. Scale bar, 50  $\mu$ m.

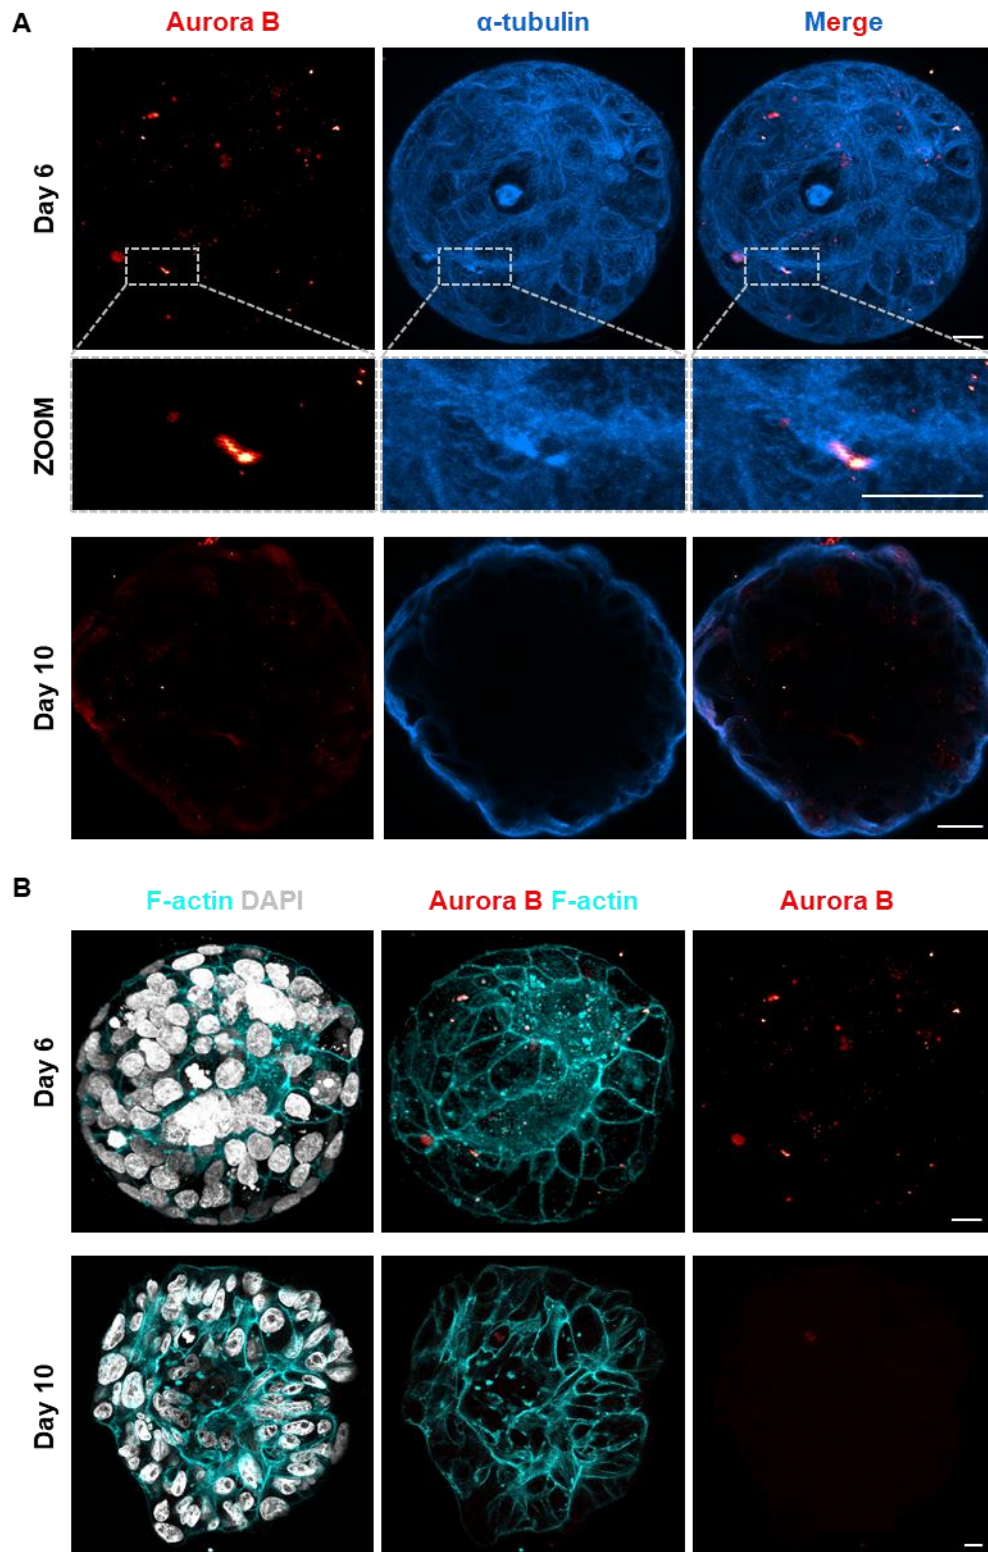

**Supplementary Figure 3. Verification of 'cytoplasmic bridge' in human embryos.**

**A.** Immunostaining of day 6 and day 10 human embryos (n=2 and n=2) cultured *in vitro* for  $\alpha$ -tubulin and Aurora B. Dotted rectangle represented regions that are shown with higher magnification. Scale bars, 20  $\mu$ m.

**B.** Immunostaining of day 6 and day 10 human embryos (n=3 and n=3) cultured *in vitro* for F-actin and Aurora B. DAPI, grey, DNA. Scale bars, 20  $\mu$ m.

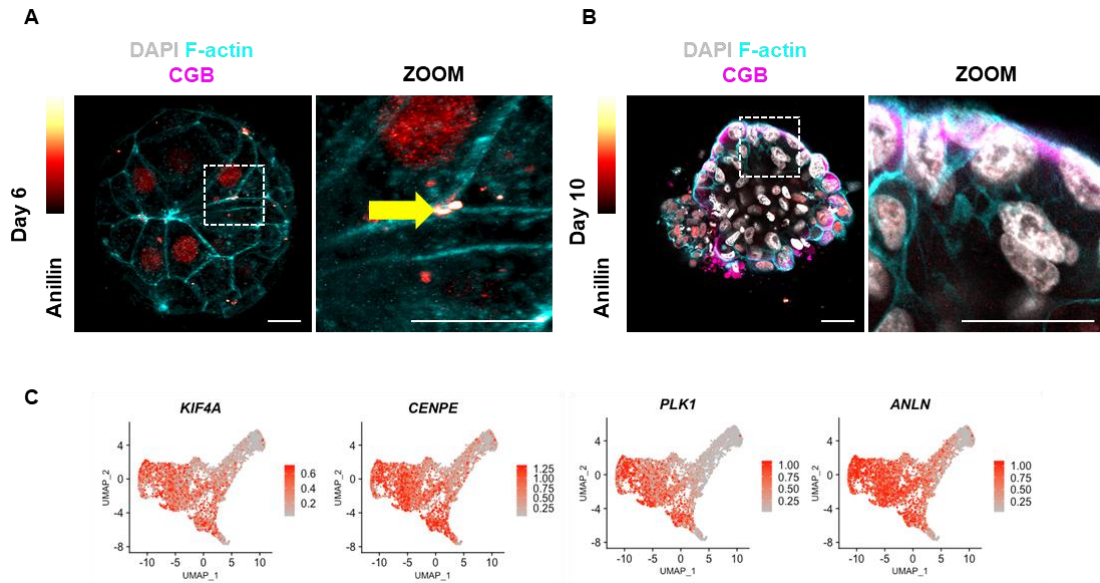

**Supplementary Figure 4. Loss of 'cytoplasmic bridge' in pSTB.**

**A.** Immunostaining of day 6 human embryos for F-actin, CGB, and Anillin. DAPI, grey, DNA. Dotted rectangle represented magnified area. Yellow arrow indicated 'cytoplasmic bridge'. Scale bars, 20  $\mu$ m.

**B.** Immunostaining of day 10 human embryos for F-actin, CGB, and Anillin. DAPI, grey, DNA. Dotted rectangle represented magnified area. Scale bars, 50  $\mu$ m.

**C.** UMAP plots showing the indicated genes in trophoblast cells. Color key from grey to red indicates relative expression levels from low to high, respectively.

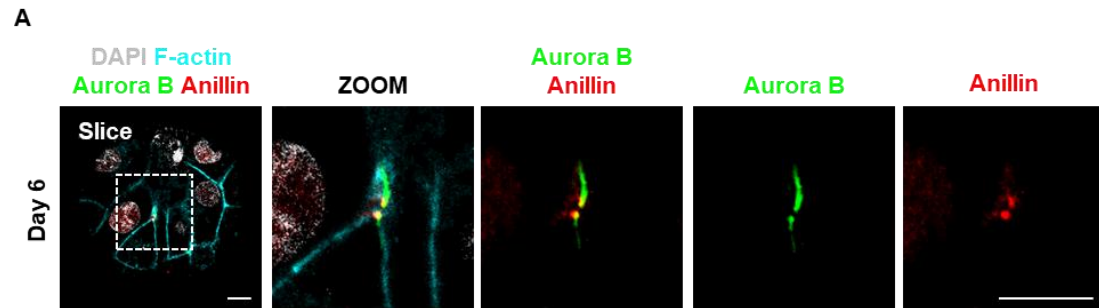

**Supplementary Figure 5. Co-immunostaining of ‘cytoplasmic bridge’ in human embryos.**

**A.** Immunostaining of day 6 human embryos for F-actin, Aurora B, and Anillin. DAPI, grey, DNA. Dotted rectangle represented magnified area. Scale bars, 10  $\mu\text{m}$ .



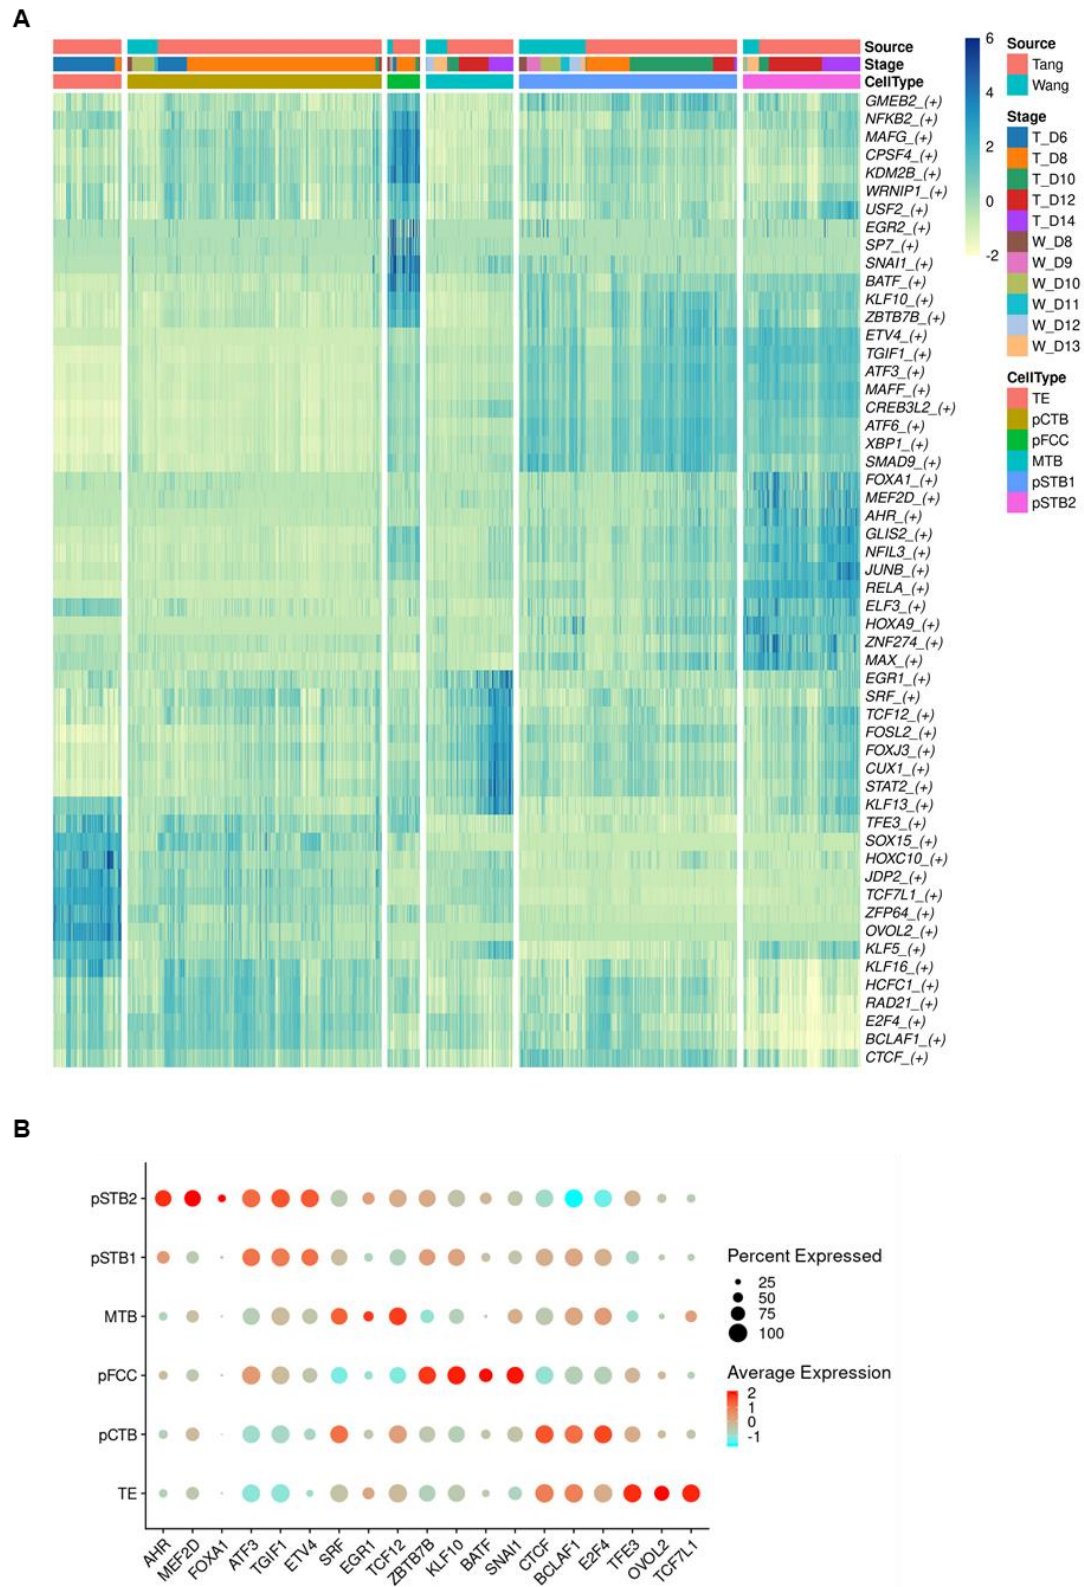

**Supplementary Figure 6. Transcription factors expressed in the trophoblast cell subtypes.**

**A.** Heat map of transcription factors expressed in the trophoblast cell subtypes.

**B.** Dot plot showing newly identified TFs in pFCC. The color key from cyan to red indicates low to high gene expression levels, respectively.

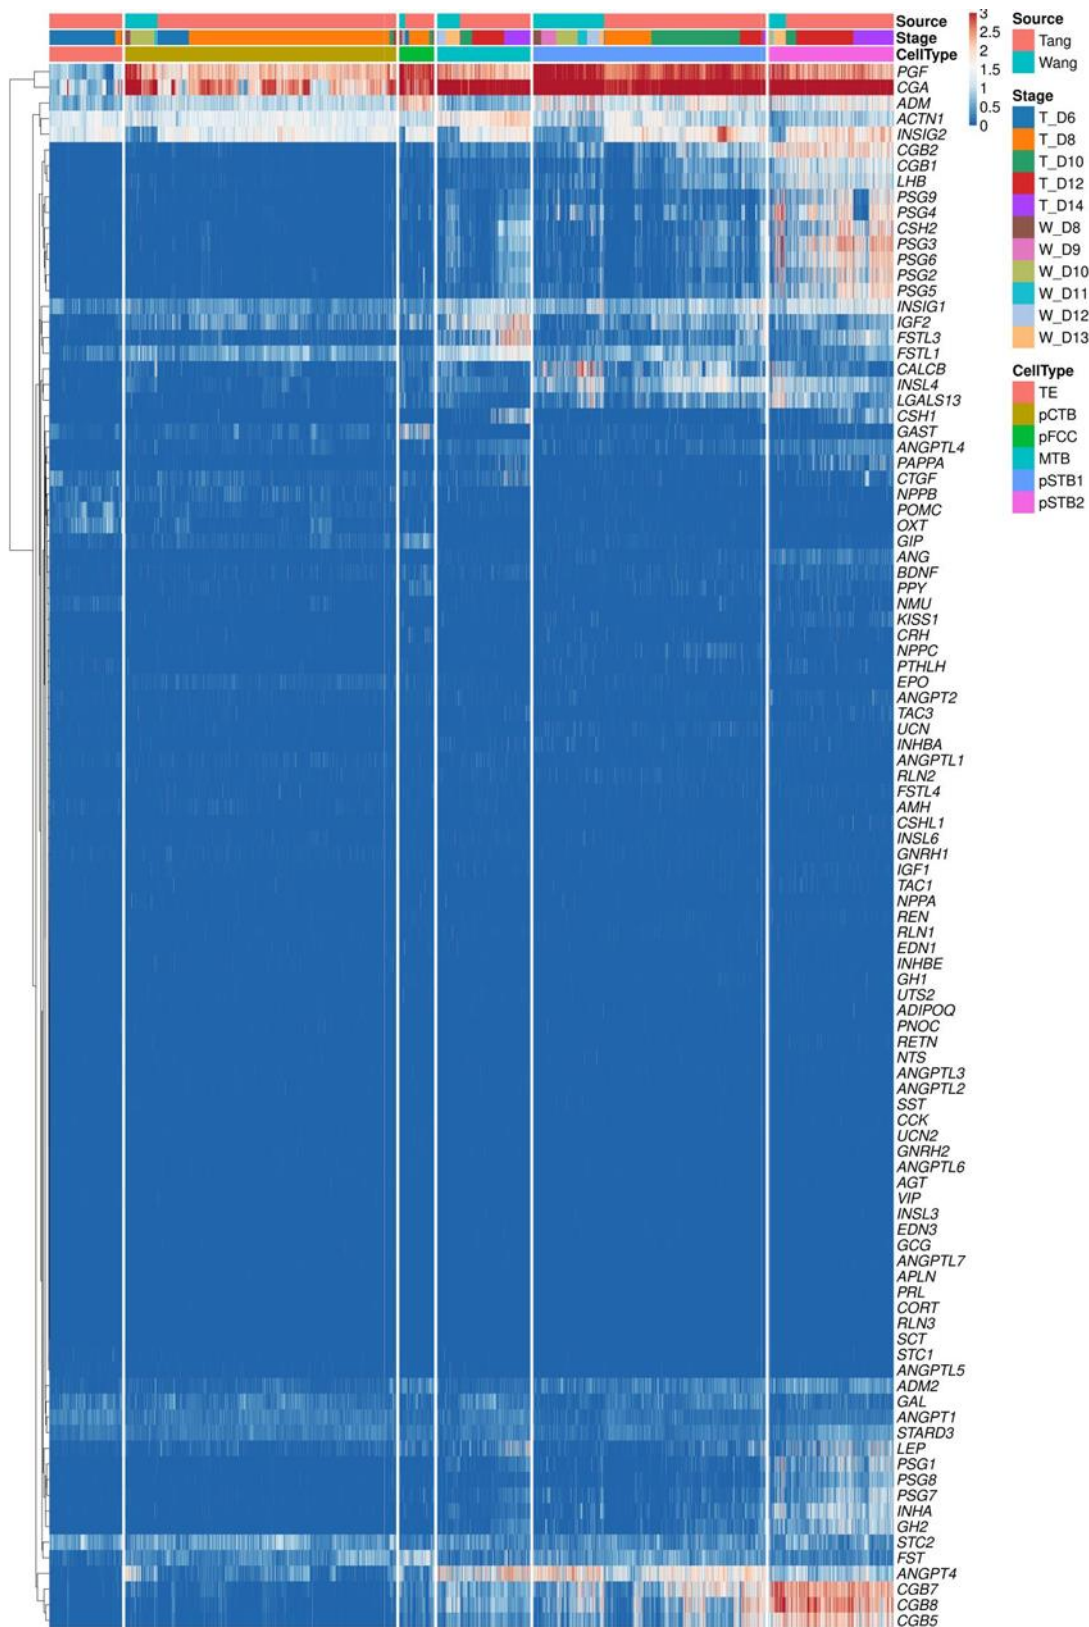

**Supplementary Figure 7. Heatmap of polypeptide hormone genes expressed in subtypes of trophoblast cells.**



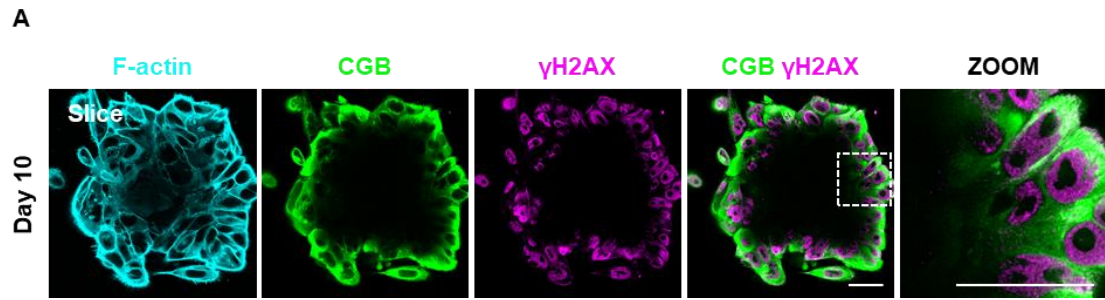

**Supplementary Figure 8. Expression of cellular aging-related genes in human embryos.**

**A.** Immunostaining of day 10 human embryos for F-actin, CGB, and  $\gamma$ H2AX. DAPI, grey, DNA. Dotted rectangle represented magnified area. Scale bars, 50  $\mu$ m.

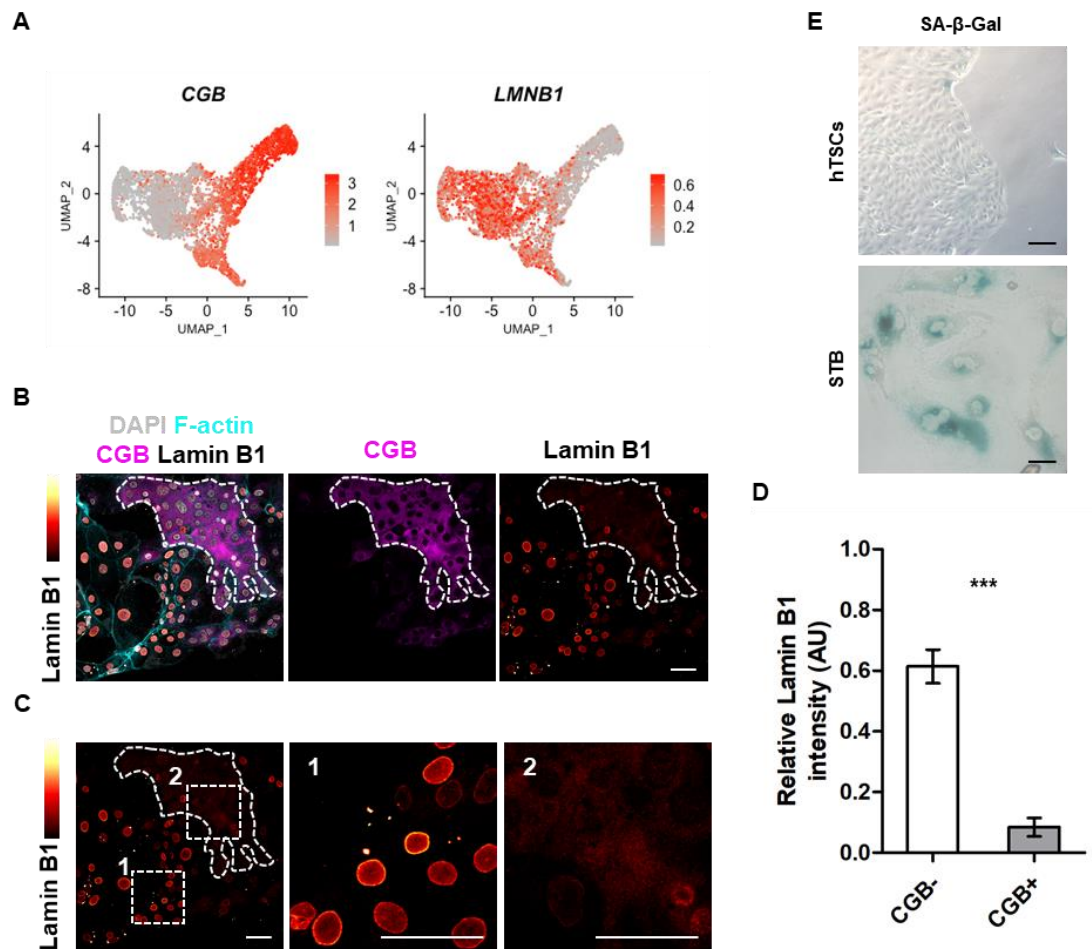

**Supplementary Figure 9. Expression of cellular aging-related genes in human embryos and STB differentiated from hTSCs.**

**A.** UMAP plots showing the indicated genes in trophoblast cells. Color key from grey to red indicates relative expression levels from low to high, respectively.

**B.** Immunostaining of STB for F-actin, CGB, and Lamin B1. DAPI, grey, DNA. Scale bar, 50  $\mu$ m.

**C.** Immunostaining of STB for Lamin B1. DAPI, grey, DNA. Dotted line represented CGB<sup>+</sup>STB. Dotted rectangle represented magnified area. Scale bars, 50  $\mu$ m.

**D.** Relative Lamin B1 intensity of images in B. Data are presented as the mean  $\pm$  s.e.m.. \*\*\*P < 0.001.

**E.** SA- $\beta$ -gal staining of hTSCs and STB at passage 20. Scale bars, 50  $\mu$ m.

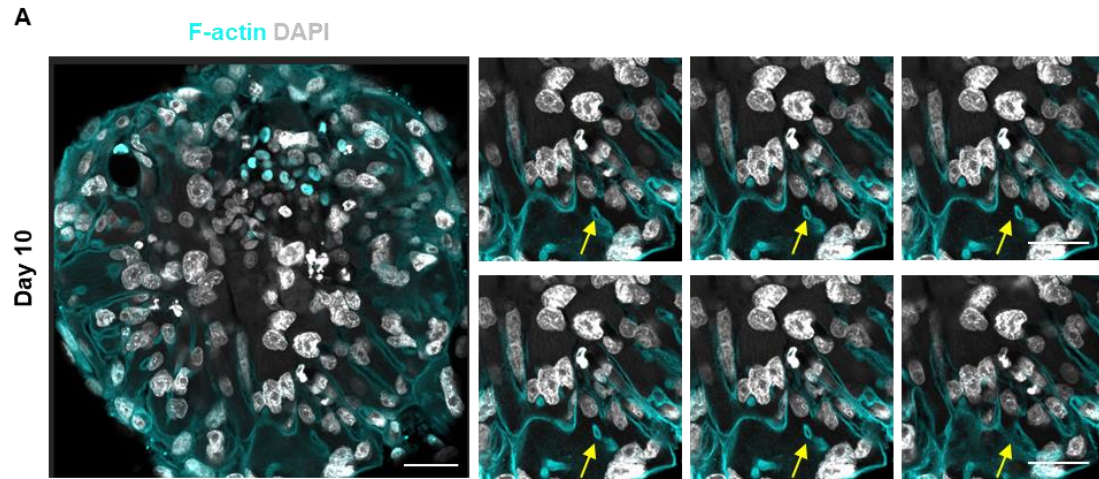

**Supplementary Figure 10. Immunostaining of F-actin in human embryos.**

**A.** Immunostaining of day 10 human embryos for F-actin. DAPI, grey, DNA. Arrows represented 'lacunae' in pSTB of human embryos. Scale bars, 50  $\mu\text{m}$ .

## **Supplementary Text**

### Competing financial interests

The authors declare no competing financial interests.

### Materials & Correspondence

Correspondence and material requests should be addressed to Hongmei Wang.

**Supplemental Code:** eryxoksanzglhqj

**Supplementary Table 1. Antibodies**

| <b>Name</b>                        | <b>Manufacturer<br/>name</b>   | <b>Code<br/>number</b> | <b>Dilution</b> | <b>Lot</b>   | <b>Polyclonal<br/>or<br/>Monoclonal</b> |
|------------------------------------|--------------------------------|------------------------|-----------------|--------------|-----------------------------------------|
| <b>Phalloidin</b>                  | YEASEN                         | 40735ES75              | 1:200           | F1001230     | N/A                                     |
| <b>CGB</b>                         | Golden Bridge<br>Biotechnology | ZM-0134                | 1:200           | N/A          | monoclonal                              |
| <b>CGB</b>                         | Abcam                          | ab53087                | 1:200           | 899357       | polyclonal                              |
| <b>GATA6</b>                       | RD                             | AF1700                 | 1:200           | N/A          | polyclonal                              |
| <b>OCT4A</b>                       | Cell Signaling<br>Technology   | 2840P                  | 1:200           | 9            | monoclonal                              |
| <b>Lamin A</b>                     | Abcam                          | ab26300                | 1:200           | GR3222248-1  | polyclonal                              |
| <b><math>\gamma</math>H2AX</b>     | Abcam                          | ab2893                 | 1:200           | GR3270858-1  | polyclonal                              |
| <b>Aurora B</b>                    | Abcam                          | ab2254                 | 1:200           | GR3210135-1  | polyclonal                              |
| <b><math>\alpha</math>-tubulin</b> | YEASEN                         | 30304ES40              | 1:200           | T16546       | monoclonal                              |
| <b>Anillin</b>                     | Abcam                          | ab211872               | 1:100           | GR3271951-21 | monoclonal                              |
| <b>Lamin B1</b>                    | Zen BioScience                 | 201169                 | 1:100           | EE1124       | monoclonal                              |
| <b>GATA3</b>                       | Cell Signaling<br>Technology   | 5852S                  | 1:200           | 5            | monoclonal                              |



**Supplementary Table 2. Number of human embryos for scRNA-seq**

| <b>Time</b> | <b>Number of human embryos</b> |
|-------------|--------------------------------|
| Day 8       | 2                              |
| Day 9       | 3                              |
| Day 10      | 3                              |
| Day 11      | 2                              |
| Day 12      | 1                              |
| Day 13      | 1                              |
